# Supplementary material for: Subnuclear gene positioning through lamina association affects copper tolerance
Source: PubMed Central journal article supplement (PMC7679404; doi:10.1038/s41467-020-19621-z), 2020-11-20
Supplement: 41467_2020_19621_MOESM2_ESM.pdf [file 41467_2020_19621_MOESM2_ESM.pdf]

## **Descriptions of Additional Supplementary Files**

### **Supplementary Data 1**

**Description:** Primer and probe list
